# Copy Number Variants in Patients with Severe Oligozoospermia and Sertoli-Cell-Only Syndrome

Frank Tüttelmann<sup>1\*</sup>, Manuela Simoni<sup>2</sup>, Sabine Kliesch<sup>3</sup>, Susanne Ledig<sup>1</sup>, Bernd Dworniczak<sup>1</sup>, Peter Wieacker<sup>1</sup>, Albrecht Röpke<sup>1</sup>

**1** Institute of Human Genetics, University of Münster, Münster, Germany, **2** Department of Medicine, Endocrinology, Metabolism and Geriatrics, University of Modena and Reggio Emilia, Modena, Italy, **3** Department of Clinical Andrology, Centre of Reproductive Medicine and Andrology, University of Münster, Münster, Germany

## Abstract

A genetic origin is estimated in 30% of infertile men with the common phenotypes of oligo- or azoospermia, but the pathogenesis of spermatogenic failure remains frequently obscure. To determine the involvement of Copy Number Variants (CNVs) in the origin of male infertility, patients with idiopathic severe oligozoospermia (N = 89), Sertoli-cell-only syndrome (SCOS, N = 37) and controls with normozoospermia (N = 100) were analysed by array-CGH using the 244A/400K array sets (Agilent Technologies). The mean number of CNVs and the amount of DNA gain/loss were comparable between all groups. Ten recurring CNVs were only found in patients with severe oligozoospermia, three only in SCOS and one CNV in both groups with spermatogenic failure but not in normozoospermic men. Sex-chromosomal, mostly private CNVs were significantly overrepresented in patients with SCOS. CNVs found several times in all groups were analysed in a case-control design and four additional candidate genes and two regions without known genes were associated with SCOS ( $P < 1 \times 10^{-3}$ ). In conclusion, by applying array-CGH to study male infertility for the first time, we provide a number of candidate genes possibly causing or being risk factors for the men's spermatogenic failure. The recurring, patient-specific and private, sex-chromosomal CNVs as well as those associated with SCOS are candidates for further, larger case-control and re-sequencing studies.

**Citation:** Tüttelmann F, Simoni M, Kliesch S, Ledig S, Dworniczak B, et al. (2011) Copy Number Variants in Patients with Severe Oligozoospermia and Sertoli-Cell-Only Syndrome. PLoS ONE 6(4): e19426. doi:10.1371/journal.pone.0019426

**Editor:** Laszlo Orban, Temasek Life Sciences Laboratory, Singapore

**Received:** November 23, 2010; **Accepted:** April 3, 2011; **Published:** April 29, 2011

**Copyright:** © 2011 Tüttelmann et al. This is an open-access article distributed under the terms of the Creative Commons Attribution License, which permits unrestricted use, distribution, and reproduction in any medium, provided the original author and source are credited.

**Funding:** The study was supported by the Deutsche Forschungsgemeinschaft Research Unit 'Germ Cell Potential' (FOR 1041, grant TU 298/1-1). The funders had no role in study design, data collection and analysis, decision to publish, or preparation of the manuscript.

**Competing Interests:** The authors have declared that no competing interests exist.

\* E-mail: frank.tuettelmann@ukmuenster.de

## Introduction

Infertility, which affects 10–15% of all couples, is attributed to a male (co-)factor in around 50%. Male infertility is mostly caused by spermatogenic failure, clinically noted as oligo- or azoospermia. However, the reasons for the decreased sperm production remain largely unclear: After a full clinical workup around 30% of cases are considered 'idiopathic infertile' and an additional 40% have not sufficient/uncertain causes (e.g. varicocele, infections) [1,2]. On the other hand, it is estimated that about 30% of azoo-/oligozoospermia are caused by chromosomal abnormalities or mutations of genes involved in germ cell production and function [3]. Thus, male infertility of genetic origin supposedly affects about 1 in 40 adult men and can be considered a common, complex disease.

The currently established genetic causes of male infertility comprise abnormalities on all genomic levels from chromosomal abnormalities, in particular Klinefelter syndrome, to Y-chromosomal (azoospermia factor, AZF) deletions, to mutations of the cystic fibrosis transmembrane conductance regulator (*CFTR*, all gene information - name, location, IDs - available as Table S1) gene. However, although routinely performed in clinical workup [4] karyotyping, AZF deletion screening and *CFTR* sequencing elucidate the reason for infertility in only 5% of unselected and around 20% of azoospermic patients [1,2].

A multitude of up to 1,500 genes are thought to be involved in spermatogenesis of which 300–600 are specifically expressed in the male germline [5–7] and are therefore candidates for causing male infertility. In the last 5–10 years, many efforts have been undertaken with research focused on targeted re-sequencing of a number of these candidate genes. Nevertheless, up to date no additional genetic cause is recognised to be administrable in patient care, mostly because results have either not been replicated or might only explain minute effects [8–10].

Copy Number Variants (CNVs) have been shown to be an important source of genetic diversity with remarkable differences between individuals and to play a role in complex diseases such as mental retardation, schizophrenia and cancer [11,12]. Recently, CNVs have also been analysed in premature ovarian failure (POF), XY gonadal dysgenesis and Mayer-Rokitansky-Küster-Hauser syndrome, diseases linked to genital development and function [13–15]. To date, CNVs have not been analysed in men with spermatogenic failure and we hypothesised that CNVs cause spermatogenic failure by either of the following mechanisms: An increased number or specific distribution of CNVs could result in defective recombination, meiotic failure and loss of germ cells. CNVs might also affect the activity of individual genes important for spermatogenesis. We therefore performed high-resolution array Comparative Genomic Hybridisation (array-CGH) in groups of well-characterised idiopathic infertile men with oligo-

**Table 1.** Comparison of clinical parameters between the study groups (mean  $\pm$  standard deviation and median, range (min-max) in brackets).

|                                   | Normozoospermic controls (N = 100)     | Severe oligozoospermia (N = 89) | Sertoli-cell-only syndrome (N = 37) |
|-----------------------------------|----------------------------------------|---------------------------------|-------------------------------------|
| Age [y]                           | 40.1 $\pm$ 4.4 (40, 30–59)             | 38.7 $\pm$ 5.8 (39, 23–58)      | 40.3 $\pm$ 5.4 (40, 29–50)          |
| Testicular volume [ml]            | 58 $\pm$ 18 (59, 22–111)               | 41 $\pm$ 13 (39, 12–89)**       | 29 $\pm$ 11 (30, 10–56)**           |
| LH [U/l]                          | 3.1 $\pm$ 1.2 (3.0, 0.7–7.1)           | 4.5 $\pm$ 2.3** (4.0, 1.5–14.1) | 7.8 $\pm$ 3.2** (6.7, 3.1–15.6)     |
| FSH [U/l]                         | 3.7 $\pm$ 2.0 (3.1, 1.3–9.4)           | 7.7 $\pm$ 5.4** (5.7, 1.2–24.5) | 15.3 $\pm$ 4.9** (21.1, 8.5–37.9)   |
| Testosterone [nmol/l]             | 16.4 $\pm$ 5.1 (15.9, 6.9–39.0)        | 15.3 $\pm$ 4.9 (15.0, 4.6–31.3) | 14.1 $\pm$ 5.8 (12.4, 7.6–34.4)**   |
| Abstinence [d]                    | 3.9 $\pm$ 1.6 (4, 2–7)                 | 3.8 $\pm$ 1.3 (4, 2–7)          | 4.2 $\pm$ 1.2 (4, 2–10)             |
| Sperm concentration [ $10^6$ /ml] | 77.0 $\pm$ 47.0 (62.0, 20.0–231.0)     | 1.4 $\pm$ 1.2** (1.1, 0.1–5.0)  | 0**                                 |
| Semen volume [ml]                 | 3.9 $\pm$ 1.5 (3.5, 2.0–9.0)           | 3.6 $\pm$ 1.4 (3.4, 1.5–9.2)    | 4.1 $\pm$ 1.8 (4.0, 1.0–10.0)       |
| Total sperm count [ $10^6$ ]      | 287.3 $\pm$ 182.1 (269.5, 40.0–1083.5) | 4.5 $\pm$ 3.3** (3.8, 0.3–10.0) | 0**                                 |
| a+b Motility [%]                  | 53.7 $\pm$ 5.9 (54, 36–75)             | 32.4 $\pm$ 13.0** (31, 4–60)    | -                                   |
| Normal morphology [%]             | 16.7 $\pm$ 5.2 (16, 10–34)             | 6.0 $\pm$ 5.6** (5, 1–24)       | -                                   |

\*\*significantly different compared to controls ( $P < 0.01$  calculated by Mann-Whitney test).

doi:10.1371/journal.pone.0019426.t001

and azoospermia. For comparison, normozoospermic controls were analysed, because the current databases of structural genomic variation do not provide the necessary information when evaluating spermatogenesis and fertility. We wanted to determine a) whether the number and/or pattern in selected men with spermatogenic failure differs from that in men with normal spermatogenesis; b) whether recurrent CNVs can be identified which might harbour genes involved in spermatogenesis; c) associations with reproductive parameters.

## Materials and Methods

### Study population

Caucasian patients of German origin with idiopathic infertility were selected from the clientele of the Department of Clinical Andrology of the Centre of Reproductive Medicine and Andrology, Münster, a tertiary-referral centre, using the Androbase© database [16]. All participants underwent a complete physical examination including ultrasonographic analysis of the

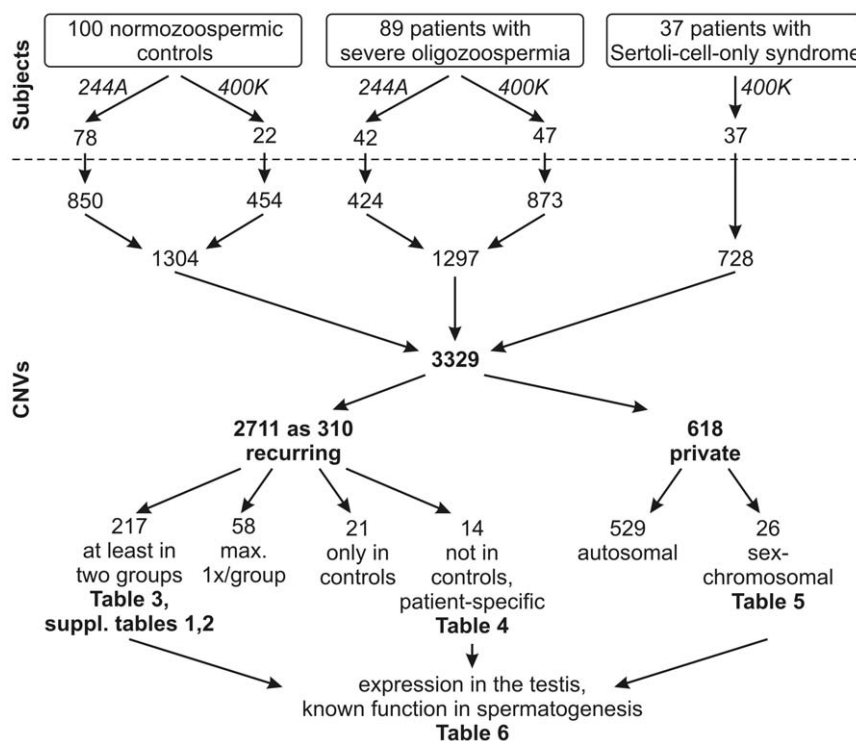

**Figure 1.** Workflow with different arrays (244A, 400K), number of subjects and categorisation of CNVs.

doi:10.1371/journal.pone.0019426.g001

**Table 2.** Detected CNVs and amount of DNA change per man separately for each array resolution (mean  $\pm$  standard deviation).

| Array            | Normozoospermic controls |                 | Severe oligozoospermia |                 | Sertoli-cell-only syndrome |
|------------------|--------------------------|-----------------|------------------------|-----------------|----------------------------|
|                  | 244A                     | 400K            | 244A                   | 400K            | 400K                       |
| CNVs [N]         | 10.9 $\pm$ 3.0           | 20.6 $\pm$ 5.7  | 10.2 $\pm$ 2.8         | 18.5 $\pm$ 6.3  | 19.7 $\pm$ 5.9             |
| Duplications [N] | 5.0 $\pm$ 2.5            | 11.3 $\pm$ 5.0  | 4.9 $\pm$ 2.4          | 8.8 $\pm$ 3.8   | 9.2 $\pm$ 4.1              |
| Deletions [N]    | 5.9 $\pm$ 2.3            | 9.4 $\pm$ 3.0   | 5.4 $\pm$ 2.1          | 9.6 $\pm$ 3.8   | 10.5 $\pm$ 3.4             |
| DNA change [Kb]  | 2732 $\pm$ 1335          | 3076 $\pm$ 842  | 3015 $\pm$ 1383        | 3313 $\pm$ 2257 | 3087 $\pm$ 1292            |
| DNA gain [Kb]    | 1510 $\pm$ 1234          | 1649 $\pm$ 1144 | 1842 $\pm$ 1414        | 1761 $\pm$ 1219 | 1464 $\pm$ 850             |
| DNA loss [Kb]    | 1223 $\pm$ 745           | 1427 $\pm$ 730  | 1173 $\pm$ 932         | 1551 $\pm$ 1841 | 1624 $\pm$ 950             |

No significant differences were found between the study groups. *P*-values calculated by two-sample t-tests.  
doi:10.1371/journal.pone.0019426.t002

scrotal content. Ejaculates were obtained by masturbation after 2–7 days of sexual abstinence and all semen values were determined in accordance with the then current WHO criteria [17]. All men with known clinical (e.g. maldescended testes, varicocele, infections) and genetic (karyotype anomalies, Y-chromosomal deletions) causes of infertility were excluded. Of these men, one-hundred with  $\geq 20 \times 10^6$ /ml sperm concentration,  $\geq 40 \times 10^6$  total sperm count,  $\geq 2$  ml semen volume,  $\geq 50\%$  of a+b or  $\geq 25\%$  a motility, high percentage of normal forms ( $\geq 10\%$ ) were selected as control population with normal spermatogenesis according to WHO criteria [17]. Twenty-one (21%) of these men had previously induced a spontaneous pregnancy in the current or a former relationship. The study populations comprised patients with a) severe oligozoospermia (N = 89 with  $\leq 5 \times 10^6$ /ml sperm concentration and  $\leq 10 \times 10^6$  total sperm count) and b) azoospermia and complete bilateral Sertoli-cell-only syndrome (SCOS, N = 37). The diagnosis of SCOS was established if only tubules with Sertoli-cells were detected in bilateral and multilocular (at least two sites per testis) testicular biopsies and the attempt of testicular sperm extraction (TESE) was unsuccessful.

### Ethics statement

All participants gave written informed consent for evaluation of their clinical data and genetic analysis of their donated DNA samples according to a protocol approved by the Ethics Committee of the Medical Faculty in Münster and State Medical Board.

### Array-CGH

Genomic DNA was extracted from peripheral blood by standard methods and analysed at first by the commercially available Human Genome CGH Microarray Kits 244A (Agilent Technologies, Santa Clara, California, USA). This array comprises 236,381 60-mer oligonucleotide probes with a median probe spacing of 8.9 Kb. During the course of the study, the higher-resolution 400K microarray with 411,056 oligonucleotides and a median probe spacing of 5.3 Kb became available. We switched to using this array to be able to compare the impact of smaller CNVs detected with the higher-resolution on spermatogenic failure. Finally, 78 control men and 42 with severe oligozoospermia were analysed with the 244A arrays and 22 and 47 with the 400K arrays. All azoospermic patients with SCOS were analysed with the 400K arrays. Each patient's DNA was compared to 10 pooled DNAs (Promega Human Genomic DNA: Male, Cat.-Nr. G1471). Labelling and hybridisation were performed according to the manufacturer's protocol. In brief, 1  $\mu$ g of patients' DNA and the

pooled control DNA were double-digested with *AluI* and *RsaI* (Promega, Madison, Wisconsin, USA) and subsequently labelled with Cy5- and Cy3-dUTP using the Genomic DNA Enzymatic Labeling kit (Agilent Technologies), respectively. After purification of the labelled DNA by filtration (Microcon YM-30, Millipore, Bilerica, Massachusetts, USA), patient and control DNA were pooled and hybridised with 25  $\mu$ g of human COT DNA (ArrayGrade KREACot DNA, Kreatech, Amsterdam, The Netherlands) for 40 h at 65°C in the hybridisation oven (Agilent Technologies). After post-hybridisation washes, the arrays were scanned using a Microarray Scanner (G2565BA, Agilent Technologies), and the spot intensities were measured by 'Feature Extraction Software' (version 10.7, Agilent Technologies). Analyses and visualisation were performed with 'DNA Analytics' (version 4.0.81, Agilent Technologies) with the following parameters: aberration algorithm ADM-2, threshold 6.0, fuzzy zero, centralisation and moving average window 1 Mb. Aberrant signals including 4 or more adjacent probes were considered as genomic CNVs. The raw array-data acquired by the Feature Extraction Software is accessible through the Gene Expression Omnibus (GEO, <http://www.ncbi.nlm.nih.gov/geo>, series record GSE27965) and the abstracted CNVs were submitted to the Database of genomic structural variation (dbVar, <http://www.ncbi.nlm.nih.gov/dbvar>, study ID nstd53). CNVs found in normozoospermic controls are also available as Table S2. The Database of Genomic Variants (DGV, <http://projects.tcag.ca/variation/>) was used to compare findings to previously reported studies. Coordinates of CNVs are based on the National Center for Biotechnology Information (NCBI) Human Genome Build 36 (hg18).

### Statistical analysis

Comparisons between patients and controls were carried out using the two-sample t-tests if data were normally distributed (e.g. number of CNVs) and otherwise non-parametric Mann-Whitney test. Frequencies were compared by Fisher's exact test. In principle, *P*-values less than 0.05 were considered statistically significant. To correct for multiple testing, *P*-values were adjusted according to the Bonferroni-Holm procedure, which is less conservative than the standard Bonferroni correction. As semen parameters were not normally distributed, correlations were calculated for log-transformed values. All calculations were performed with Stata/SE (StataCorp LP, version 9.1, College Station, Texas, USA) or GraphPad Prism version 5.00 for Windows (GraphPad Software, San Diego, California, USA).

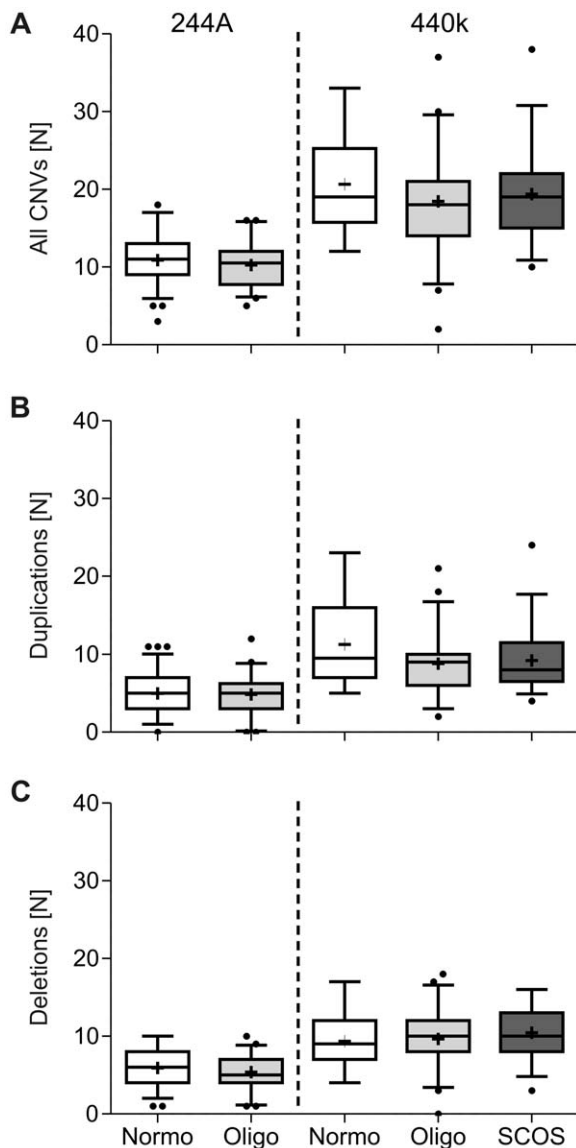

**Figure 2. Number of CNVs (A), duplications (B) and deletions (C) separated by array (left: 244A, right: 400K) and patient group (Normo = normozoospermia, Oligo = severe oligozoospermia, SCOS = Sertoli-cell-only syndrome).** Around twice as many CNVs (independent of type and fitting the roughly two-fold increased resolution) were detected with the 440K array and in general more duplications than deletions. No significant differences between patient groups were found.  
doi:10.1371/journal.pone.0019426.g002

## Results

### Clinical data

The clinical parameters of the normozoospermic controls and the two study groups with severe oligozoospermia and azoospermia caused by SCOS are presented in Table 1. Testicular volume was lower and LH as well as FSH higher in the two groups with spermatogenic failure. Patients with SCOS also had lower testosterone serum levels. Duration of abstinence and semen volume were comparable between all groups. Sperm concentration and count as well as percentage of sperm with normal morphology and progressive motility were significantly different by selection.

### Comparison of CNVs between groups

In total, 1304 CNVs were detected in 100 controls, 1297 CNVs in oligozoospermic men ( $N = 89$ ) and 728 CNVs in patients with SCOS ( $N = 37$ ); the numbers and categorisations of CNVs are depicted in Figure 1. CNV size ranged from 1.9 Kb to 4.7 Mb with only 5% larger than 1 Mb. The number of detected CNVs and amount of DNA change per men is presented in Table 2 according to study group. As expected from the two-fold increased resolution, around twice as many CNVs and also duplications/deletions separately were found with the higher-resolution 400K array (Fig. 2). The amount of DNA change did not increase likewise with the 400K arrays, as mostly smaller CNVs were additionally detected. Overall, no significant differences in number of CNVs (Fig. 2) or amount of DNA change were found between controls and the two study groups. In addition, particularly large ( $>500$  Kb,  $>1$  Mb) CNVs were analysed, but did not show different distributions between groups.

To analyse whether the chromosomal distribution of CNVs was different between the groups, the number of CNVs, and duplications/deletions separately, was calculated per chromosome and normalised to 100 men (Fig. 3). The overall distribution of duplications and deletions was found to be significantly different between all groups ( $P < 0.01$ ) and for both types of arrays. The *post-hoc* comparison of number of CNVs per single chromosome indicated significant differences between patients and controls for several chromosomes after Bonferroni-Holm correction. The detailed per-chromosome analysis revealed no specific hotspots associated with oligozoospermia or SCOS on the respective chromosomes. In contrast, the differences in the distribution were caused by recurring CNVs that were found more or less frequently in the respective study groups (see below).

In many cases, several differently sized CNVs spanned a common region but probably have different breakpoints. If either the gene content was identical or the CNVs spanned regions with the breakpoints distance  $\pm 10$  Kb (roughly corresponding to one oligonucleotide and thereby the minimum array resolution), these CNVs were aggregated for statistical analyses. Duplications and deletions were considered as different variants because of their supposedly diverse impact. Of the 3329 CNVs, a majority of 2711 (81%) could thereby be summarised as 310 recurring variants (159 deletions and 151 duplications), of which the smallest common region is then reported. Some of these were only found in normozoospermic controls ( $N = 21$ ), at most once per group ( $N = 58$ ) or not in controls ( $N = 14$ , recurring, patient-specific CNVs).

The frequencies of the remaining 217 variants were compared between the study groups (Table S3 and Table S4). Plots of the  $-\log_{10}P$ -values (Manhattan-plots) of case-control comparisons are presented in Fig. 4. To correct for multiple testing, the  $P$ -value for selection of candidate CNVs was set to 0.001 and these 6 are reported in Table 3. Except the decreasing frequency of a deletion on 4q13.1 including *UGT2B17* and a small duplication on 14q32.33 without known genes, all differences remained significant also after Bonferroni-Holm correction. Ten recurring CNVs were only found in patients with severe oligozoospermia, while three were SCOS specific and one CNV (3p11.1 in an intron of *EPHA3*) was found in both groups with spermatogenic failure but not in normozoospermic men (Table 4). Already from the chromosomal distribution it became clear, that sex-chromosomal CNVs were significantly overrepresented in patients with SCOS. These are all private variants summarised in Table 5. Both groups of patient-specific CNVs (Table 4 and 5) were marked as 'likely pathogenic' in dbVar. All genes in either CNVs with significantly different frequencies between patients and controls, patient-

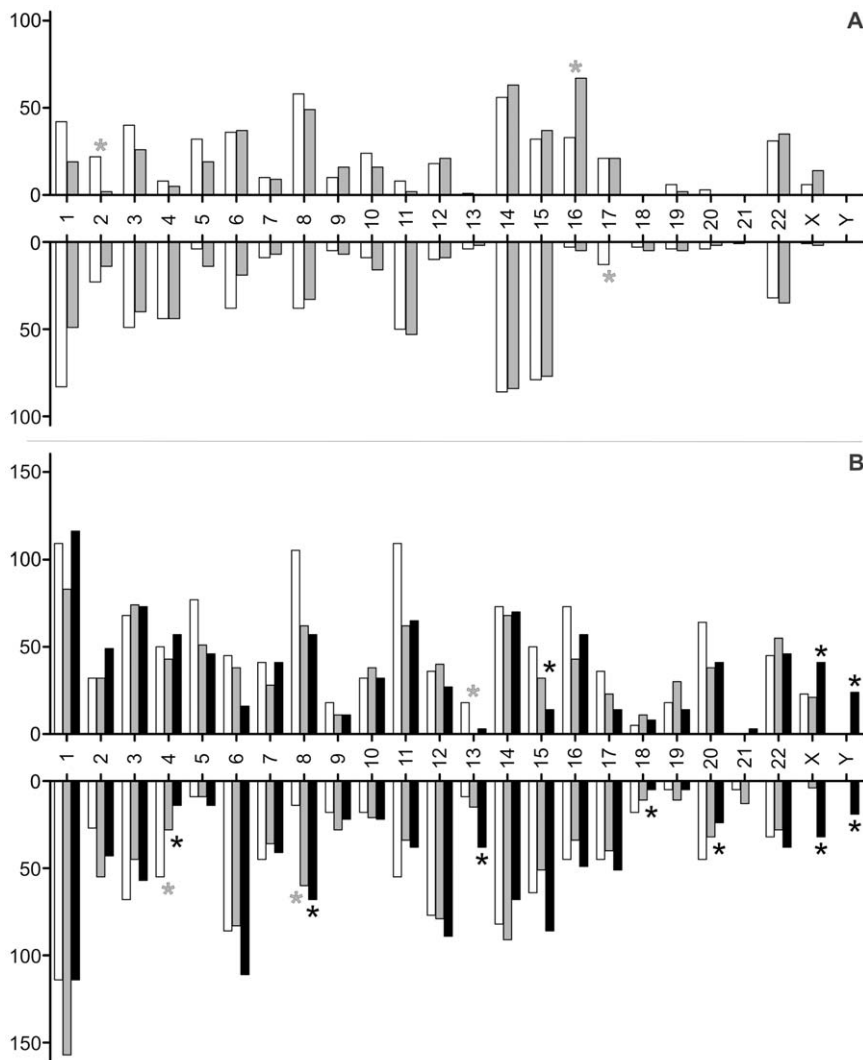

**Figure 3. Number of duplications (upwards) and deletions (downwards) per chromosome (normalised per 100 men) detected by 244A (A) and 400K (B) arrays for normozoospermic controls, oligozoospermic and SCOS patients (open, grey and black bars, respectively).** Significantly different frequencies between the groups are marked with an asterisk. *P*-values calculated by Fisher's exact test. To correct for multiple testing, *P*-level for significance was adjusted according to the Bonferroni-Holm procedure. doi:10.1371/journal.pone.0019426.g003

specific CNVs or private, sex-chromosomal CNVs (Tables 3, 4, and 5) were checked through PUBMED (<http://www.ncbi.nlm.nih.gov/pubmed>) and OMIM (<http://www.ncbi.nlm.nih.gov/omim>) searches. Those genes with known expression in the testis and/or function related to spermatogenesis are presented in Table 6.

#### Association of CNVs with semen parameters

Under the hypothesis that accumulating CNVs might lead to reduced sperm output, the number of total CNVs, duplications and deletions as well as amount of DNA change was correlated with sperm concentration and count. Because the number of deletions varies strongly with the array used, these were analysed separately. In the largest group, 78 normozoospermic men analysed by 244A arrays, a significant negative association ( $r = -0.27$ ,  $P = 0.017$ , Fig. 5) of number of deletions and total sperm count was found. Sperm concentration also showed a trend to be associated with number of deletions ( $r = -0.22$ ,  $P = 0.055$ ). These correlations were strengthened by corrections for age and

abstinence time ( $P = 0.007$  and  $P = 0.051$ ) but could not be confirmed in the other, however smaller, groups of men analysed by 400K and/or oligozoospermia. Neither correlations with sperm motility nor morphology were found in any group.

#### Discussion

For the first time, we analysed 89 strictly selected patients with severe oligozoospermia, 37 with azoospermia due to SCOS and 100 with normal spermatogenesis as controls by array-CGH. Although interpretation of the results would have been more straightforward if only one type of microarray had been used and while knowing that amount of DNA available as well as funding would not permit us to repeat the analyses on the first set of samples, we favoured switching to the higher resolution array to detect smaller CNVs in almost half of our subjects, which in the end appeared to be beneficial. As result, we report several genes and genomic regions on autosomes and more pronouncedly on the sex-chromosomes that might either be risk factors (also found in

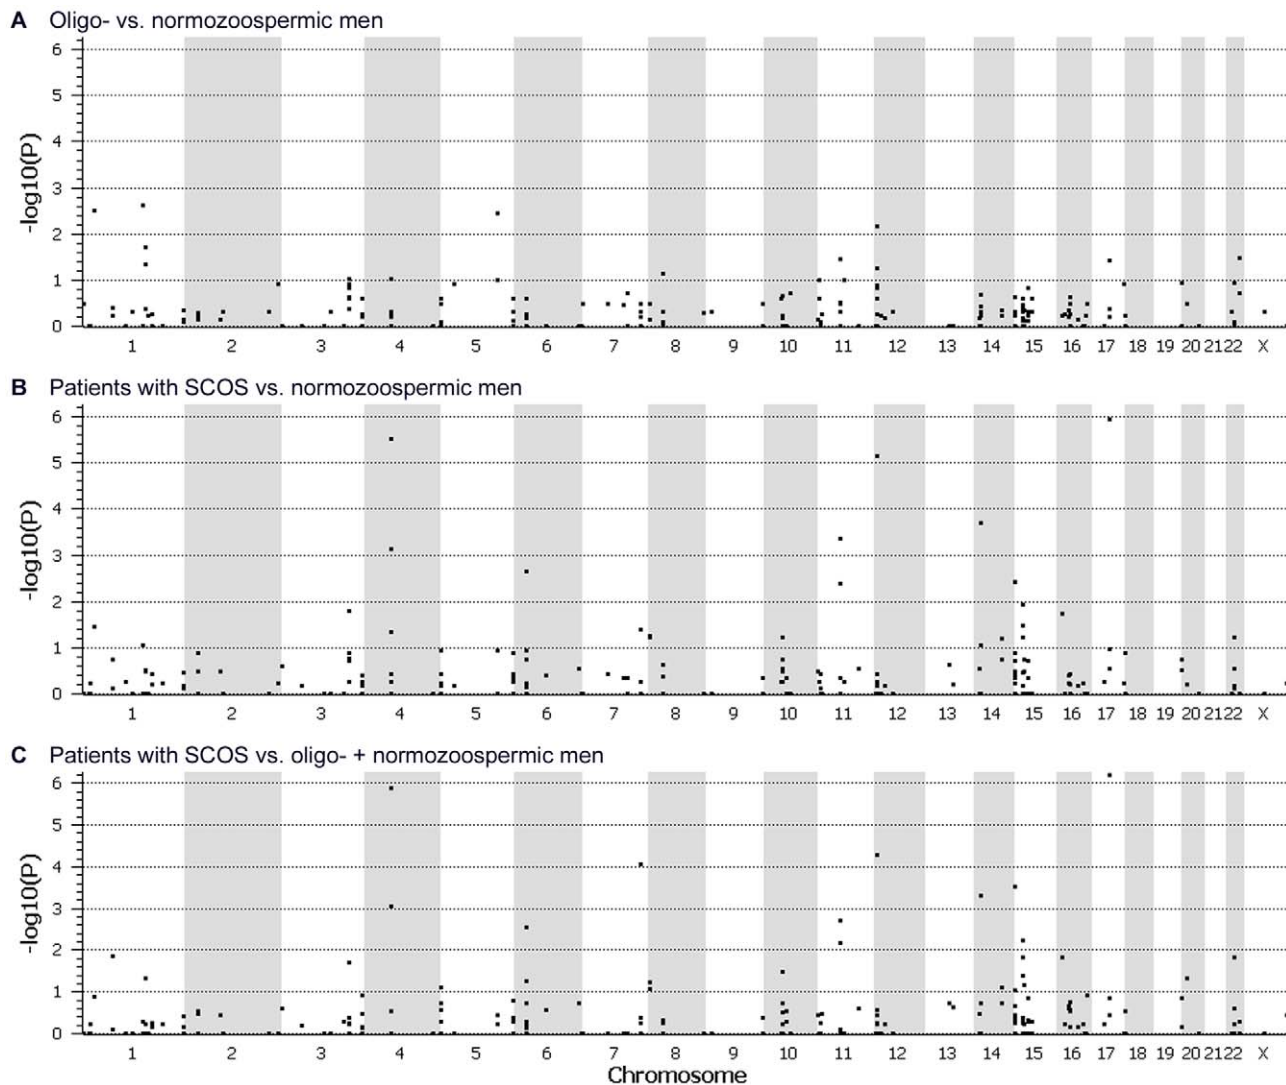

**Figure 4. Plots of  $-\log P$ -values of frequency comparisons for all recurring CNVs found in patients and controls grouped by chromosome.**  $P$ -values calculated by Fisher's exact test. The figure does not include the Y chromosome because no recurring variants were found on it.

doi:10.1371/journal.pone.0019426.g004

controls) or causative by themselves (not found in controls) for spermatogenic failure.

We hypothesised that an increased number or specific distribution of CNVs could result in defective recombination, meiotic and thereby spermatogenic failure. Structural chromosomal aberrations are found more frequently in men with oligo- and azoospermia with an emphasis on autosomal translocations in the former (3–4% compared to 0.5–1.5% in controls) and sex-chromosomal aneuploidy in the latter (13–16% compared to 0.5–1%) [18–20]. The causal relation between chromosomal rearrangements and impaired sperm production has been suggested to be a structural effect related to alterations in the process of chromosome synapsis during meiosis [21], but whether submicroscopic chromosomal rearrangements (CNVs) can result in meiotic recombination defects is not known. By comparing the number of all CNVs, duplications and deletions separately and amount of DNA change, gain and loss no significant differences were found between the groups analysed. The differences in chromosomal distribution of CNVs were attributed to single, recurring CNVs

(see below). Also particularly large ( $>1$  Mb) variants were not found more frequently in oligozoospermia or SCOS. Therefore, only even larger variants of several megabases, microscopically detectable upon conventional karyotyping, might impair chromosome synapsis and meiosis. Whether a size threshold for chromosomal aberrations having such a “direct”, gene-independent impact on spermatogenesis exists cannot be concluded from the presented data. It seems, however, that structural variation below the detection limit of routine karyotyping should not be regarded, *per se*, as an obligate cause of spermatogenic failure. Considering that translocation carriers may have normal spermatogenesis [18–20], the link between (large) structural chromosomal variation and spermatogenesis remains to be elucidated.

In principle, CNVs may result in altered gene transcription/protein function through different mechanisms: they might encompass dosage-sensitive genes, a deletion may demask a recessive mutation on the homologous chromosome, genes overlapped by structural variation may be disrupted directly or a CNV can exert position effects [22]. By comparing CNVs between



**Table 3.** The 6 recurring CNVs with significantly different ( $P < 0.001$ , marked in bold) frequencies (number of cases/all cases\* ; percentage in brackets) between patients with oligozoospermia or SCOS and normozoospermia or between SCOS and both other groups combined.

| Region   | Start     | End       | Gene Size [Kb] | Gene symbol(s)                                  | Type | Normozoosp.  | Sev. oligozoosp. | $P$            | Sertoli-cell-only syndrome | $P$            | $P$ SCOS vs. others | DGV |
|----------|-----------|-----------|----------------|-------------------------------------------------|------|--------------|------------------|----------------|----------------------------|----------------|---------------------|-----|
| 4q13.2   | 69069451  | 69166014  | 96.6           | <i>UGT2B17</i>                                  | dup  | 10/100 (10%) | 12/89 (13.5%)    | 0.50132        | 18/37 (48.6%)              | <b>0.00000</b> | <b>0.00000</b>      | yes |
| 4q13.2   | 69069451  | 69166014  | 96.6           | <i>UGT2B17</i>                                  | del  | 28/100 (28%) | 21/89 (23.6%)    | 0.51072        | 1/37 (2.7%)                | <b>0.00072</b> | <b>0.00086</b>      | yes |
| 7q34     | 141413152 | 141438704 | 25.6           | <i>MGAM</i>                                     | dup  | 1/22 (4.5%)  | 0/47 (0%)        | 0.31884        | 10/37 (27%)                | 0.04059        | <b>0.00009</b>      | yes |
| 7q34     | 141413152 | 141438704 | 25.6           | <i>MGAM</i>                                     | del  | 3/22 (13.6%) | 8/47 (17%)       | 1.00000        | 4/37 (10.8%)               | 1.00000        | 0.56819             | yes |
| 12p13.31 | 9528390   | 9610254   | 81.9           |                                                 | dup  | 1/100 (1%)   | 9/89 (10.1%)     | <b>0.00683</b> | 0/37 (0%)                  | 1.00000        | 0.37395             | yes |
| 12p13.31 | 9528390   | 9610254   | 81.9           |                                                 | del  | 4/100 (4%)   | 11/89 (12.4%)    | 0.05618        | 13/37 (35.1%)              | <b>0.00001</b> | <b>0.00005</b>      | yes |
| 14q11.2  | 19268576  | 19490830  | 222.3          | <i>OR4Q3, OR4M1, OR4N2, OR4K2, OR4K5, OR4K1</i> | dup  | 10/100 (10%) | 13/89 (14.6%)    | 0.37765        | 8/37 (21.6%)               | 0.08990        | 0.18733             | yes |
| 14q11.2  | 19268576  | 19490830  | 222.3          | <i>OR4Q3, OR4M1, OR4N2, OR4K2, OR4K5, OR4K1</i> | del  | 36/100 (36%) | 24/89 (27%)      | 0.21172        | 2/37 (5.4%)                | <b>0.00020</b> | <b>0.00049</b>      | yes |
| 14q32.33 | 105602402 | 105630289 | 27.9           |                                                 | dup  | 8/100 (8%)   | 5/89 (5.6%)      | 0.57633        | 11/37 (29.7%)              | <b>0.00370</b> | <b>0.00029</b>      | yes |
| 14q32.33 | 105602402 | 105630289 | 27.9           |                                                 | del  | 14/100 (14%) | 12/89 (13.5%)    | 1.00000        | 7/37 (18.9%)               | 0.59345        | 0.44578             | yes |
| 17q21.31 | 41521344  | 41566740  | 45.4           | <i>KIAA1267</i>                                 | dup  | 10/100 (10%) | 11/89 (12.4%)    | 0.64844        | 1/37 (2.7%)                | 0.28787        | 0.13883             | yes |
| 17q21.31 | 41521344  | 41566740  | 45.4           | <i>KIAA1267</i>                                 | del  | 6/100 (6%)   | 9/89 (10.1%)     | 0.41980        | 16/37 (43.2%)              | <b>0.00000</b> | <b>0.00000</b>      | yes |

For comparison, the corresponding duplication/deletion (if present in any group) is included independent of  $P$ -value. CNVs were checked for occurrence in the Database of Genomic Variants (DGV).

\*If CNVs were only found by higher-resolution 400K-array, the number of all cases is reduced to 22 for normozoospermic controls and to 47 for patients with severe oligozoospermia (see methods).

SCOS = Sertoli-cell-only syndrome.  $P$ -values calculated by Fisher's exact test. To correct for multiple testing,  $P$ -level for significance was adjusted according to the Bonferroni-Holm procedure. Gene information - name, location, IDs - available as Suppl. Table S1.

doi:10.1371/journal.pone.0019426.t003

**Table 4.** The 11 and 4 recurring, patient-specific CNVs not found in normozoospermic controls with number of cases, type (dup = duplication, del = deletion), gene content and whether the CNV was described in the Database of Genomic Variants (DGV).

| Group           | Region   | Start     | End       | Size (Kb) | Number, type | Gene symbol(s)                | DGV |
|-----------------|----------|-----------|-----------|-----------|--------------|-------------------------------|-----|
| Oligozoospermia | 2p11.2   | 89635198  | 89902565  | 267.0     | 2xdel        | -                             | yes |
|                 | 3p11.1   | 89476719  | 89499633  | 22.0      | 4xdel        | <i>EPHA3</i>                  | yes |
|                 | 4p16.1   | 8235974   | 8261720   | 25.7      | 2xdup        | <i>SH3TC1</i>                 | yes |
|                 | 6p21.31  | 35143115  | 35184210  | 41.1      | 2xdup        | <i>ANKS1A</i>                 | no  |
|                 | 10q23.1  | 84138134  | 84171245  | 33.1      | 2xdel        | <i>NRG3</i>                   | no  |
|                 | 10q23.33 | 96497202  | 96536412  | 39.2      | 2xdel        | <i>CYP2C19</i>                | no  |
|                 | 12q13.3  | 55866674  | 55896055  | 29.4      | 2xdup        | <i>LRP1, MIR1228</i>          | no  |
|                 | 16q22.1  | 66942648  | 66967713  | 25.1      | 2xdup        | <i>PRMT7, SMPD3</i>           | no  |
|                 | 17q12    | 30624580  | 30787596  | 163.0     | 2xdel        | <i>SLFN11, SLFN12, SLFN13</i> | no  |
|                 | 18q23    | 75746093  | 75779459  | 33.0      | 1xdup, 2xdel | <i>KCNG2, PQLC1</i>           | no  |
|                 | Xq26.3   | 134120502 | 134157976 | 37.5      | 2xdup        | <i>CXorf48</i>                | yes |
| SCOS            | 3p11.1   | 89476719  | 89499633  | 22.9      | 3xdel        | <i>EPHA3</i>                  | yes |
|                 | 8q24.3   | 145061948 | 145093349 | 31.4      | 1xdup, 1xdel | <i>PLEC, MIR661</i>           | yes |
|                 | 12p11.21 | 31132516  | 31223665  | 91.1      | 2xdel        | <i>DDX11, OVOS2</i>           | yes |
|                 | 12q23.1  | 98491661  | 98519308  | 27.6      | 2xdel        | <i>ANKS1B</i>                 | no  |

SCOS = Sertoli-cell-only syndrome. Gene information - name, location, IDs - available as Table S1.

doi:10.1371/journal.pone.0019426.t004

**Table 5.** The 12 and 14 private, sex-chromosomal, patient-specific CNVs not found in normozoospermic controls with type (dup = duplication, del = deletion), gene content and whether the CNV was described in the Database of Genomic Variants (DGV).

| Group                  | Region      | Start     | End       | Size (Kb) | Type  | Gene symbol(s)                                             | DGV             |    |
|------------------------|-------------|-----------|-----------|-----------|-------|------------------------------------------------------------|-----------------|----|
| <b>Oligozoospermia</b> | Xp21.3      | 28162190  | 28214748  | 52.0      | dup   | -                                                          | yes             |    |
|                        | Xp11.4      | 38376283  | 38513841  | 137.6     | dup   | <i>TSPAN7</i>                                              | no              |    |
|                        | Xp11.22     | 52657689  | 52978139  | 320.5     | dup   | <i>SSX7, SSX2, SPANXN5, XAGE5, XAGE3, FAM156A, FAM156B</i> | yes             |    |
|                        | Xp11.22     | 52842080  | 52909890  | 67.8      | dup   | <i>SPANXN5, XAGE5, XAGE3</i>                               | no              |    |
|                        | Xq22.1      | 102134796 | 102496321 | 361.5     | dup   | <i>BEX1, NXF3, BEX4, TCEAL8, TCEAL5, BEX2, TCEAL7</i>      | no              |    |
|                        | Xq22.2      | 103066101 | 103190187 | 124.0     | dup   | <i>TMSB15B, H2BFXP, H2BFWT, H2BFM</i>                      | yes             |    |
|                        | Xq22.3      | 105010614 | 105561054 | 550.4     | dup   | <i>NRK, SERPINA7, MUM1L1</i>                               | yes             |    |
|                        | Xq22.3      | 110238448 | 110260226 | 21.0      | dup   | <i>PAK3</i>                                                | no              |    |
|                        | Xq23        | 111598447 | 111621531 | 23.0      | del   | -                                                          | no              |    |
|                        | Xq25        | 123911267 | 124039708 | 128.4     | del   | <i>ODZ1</i>                                                | no              |    |
|                        | Xq27.1      | 139706586 | 139904507 | 197.9     | dup   | <i>MIR320D2</i>                                            | no              |    |
|                        | Xq28        | 154044877 | 154079019 | 34.0      | del   | -                                                          | no              |    |
|                        | <b>SCOS</b> | Xp22.33   | 2711073   | 2814530   | 103.5 | del                                                        | <i>XG, GYG2</i> | no |
|                        |             | Xp22.2    | 16688233  | 16707403  | 19.2  | dup                                                        | <i>SYAP1</i>    | no |
| Xp21.3                 |             | 25568263  | 25583583  | 15.3      | del   | -                                                          | no              |    |
| Xp11.3                 |             | 44067590  | 44084085  | 16.5      | dup   | <i>EFHC2</i>                                               | no              |    |
| Xq11.1                 |             | 64806000  | 64854709  | 48.7      | dup   | <i>MSN</i>                                                 | no              |    |
| Xq12                   |             | 65385501  | 65413711  | 28.2      | dup   | <i>HEPH</i>                                                | no              |    |
| Xq22.3–q23             |             | 110226892 | 110965127 | 738.2     | dup   | <i>PAK3, CAPN6, DCX, ALG13, TRPC5</i>                      | no              |    |
| Xq24                   |             | 118780844 | 118798128 | 17.3      | dup   | -                                                          | no              |    |
| Xq25                   |             | 122920543 | 123009115 | 88.6      | dup   | <i>STAG2</i>                                               | no              |    |
| Xq26.2                 |             | 131413847 | 131439663 | 25.8      | del   | <i>MBNL3</i>                                               | no              |    |
| Xq26.3                 |             | 134600709 | 134628136 | 27.4      | dup   | -                                                          | yes             |    |
| Yp11.2                 |             | 7348864   | 7491480   | 142.6     | dup   | -                                                          | no              |    |
| Y11.223                |             | 21964794  | 22058959  | 94.2      | dup   | <i>RBMY2EP (AZFb/bc)</i>                                   | yes             |    |
| Y11.23                 |             | 26870161  | 27073218  | 203.1     | dup   | -                                                          | yes             |    |

SCOS = Sertoli-cell-only syndrome. Gene information - name, location, IDs - available as TableS1.  
doi:10.1371/journal.pone.0019426.t005

the controls and the two patient groups, 11 and 4 CNVs specific for severe oligozoospermia and SCOS, respectively, were identified in more than one patient each (Table 4). In addition, 12 and 14 private, sex-chromosomal CNVs were listed (Table 5) because these may have a functional consequence of the naturally haploid genes contained therein. Also private, autosomal CNVs currently found in one patient each may contribute to the infertility phenotype, but their significance may only be evaluated by much larger studies. According to our moderately conservative approach, six CNVs were found in highly significantly different frequencies in patients with SCOS but also in controls and may be new risk factors associated with male infertility. All of these CNVs remained significant also after Bonferroni-correction. Interestingly, only one CNV in 12p13.31 without known genes was associated with severe oligozoospermia. The 81.9 Kb deletion was found with increasing frequency from controls (4%) to oligozoospermic men (12%) to men with SCOS (35%) as the most severe phenotype. However, the common deletion polymorphism

in *UGT2B17* was found in decreasing frequency while a duplication of the same locus was found in increasing frequency. These glucuronidase variants determine urinary excretion of testosterone [23,24], but have not been studied in male infertility.

Genes may be prioritised according to a known function or indirectly through their expression in the testis. Therefore, the 4 autosomal and 8 X-chromosomal genes presented in Table 6 are the distilled outcome of the current study with respect to identification of new, promising candidate genes. Most of these were shown to be expressed in Sertoli or germ cells, but their functions are mostly unknown. *EPHA3*, *ANKS1A* and *ANKS1B* were mentioned because the Anks proteins were found to modulate degradation of EphA receptors in mice [25] and therefore the three genes might represent members of a functional unit. CNVs altering one of these genes were found in 6 men (7%) with severe oligozoospermia and 5 (14%) with SCOS.

In two recent studies, our group analysed patients with POF and XY gonadal dysgenesis by array-CGH [13,14]. Interestingly, the



**Table 6.** Candidate genes with proposed function.

| Group                                                  | Phenotype            | Region  | Gene symbol    | OMIM   | Function                                                                                                                        |
|--------------------------------------------------------|----------------------|---------|----------------|--------|---------------------------------------------------------------------------------------------------------------------------------|
| <b>Risk factor</b>                                     | Normo, Oligoz., SCOS | 4q13.2  | <i>UGT2B17</i> | 601903 | glucuronidase essential for urinary testosterone excretion [23,24]                                                              |
| <b>Recurring, patient-specific CNVs</b>                | 4xOligoz./3xSCOS     | 3p11.1  | <i>EPHA3</i>   | 179611 | Anks proteins involved in modulating degradation of EphA receptors [25]                                                         |
|                                                        | 2xOligoz.            | 6p21.31 | <i>ANKS1A</i>  | 608994 |                                                                                                                                 |
|                                                        | 2xSCOS               | 12q23.1 | <i>ANKS1B</i>  | 607815 |                                                                                                                                 |
|                                                        | 2xSCOS               | 8q24.3  | <i>PLEC</i>    | 601282 | Plectin in Sertoli cells concentrated at intercellular junctions and nuclear surface [29]                                       |
|                                                        | 2xOligoz.            | 16q22.1 | <i>PRMT7</i>   | 610087 | protein methyltransferase, cooperates with the testis-specific factor CTCFL [30]                                                |
| <b>Private, sex-chromosomal, patient-specific CNVs</b> | 1xOligoz.            | Xp11.4  | <i>TSPAN7</i>  | 300096 | interaction with SPAG11B (sperm associated antigen) isoform D, associated with spermatozoa [31]                                 |
|                                                        | 1xOligoz.            | Xp11.22 | <i>SSX7</i>    | 300542 | cancer-testis antigen, expressed in normal testis tissue [32,33]                                                                |
|                                                        | 1xOligoz.            | Xp11.22 | <i>SPANX5</i>  | 300668 | cancer-testis antigen, expressed in post-meiotic spermatids [34]                                                                |
|                                                        | 1xOligoz.            | Xq22.1  | <i>BEX1</i>    | 300690 | in mice: expression in pachytene spermatocytes and spermatids [35]                                                              |
|                                                        | 1xOligoz.            | Xq22.1  | <i>NXF3</i>    | 300316 | belongs to a family of nuclear RNA export factors (NXF), Nxf2 plays a role in spermatogenesis (meiosis and maintenance) [36,37] |
|                                                        | 1xOligoz.            | Xq22.2  | <i>H2BFWT</i>  | 300507 | testis-specific histone, SNP in 5' untranslated region associated with oligozoospermia [38–40]                                  |
|                                                        | 1xOligoz./1xSCOS     | Xq22.3  | <i>PAK3</i>    | 300142 | one isoform specifically expressed in testis [41]                                                                               |
|                                                        | 1xSCOS               | Xq23    | <i>TRPC5</i>   | 300334 | interacts and co-localises with Enkurin in sperm [42]                                                                           |

OMIM = Online Mendelian Inheritance in Man (<http://www.ncbi.nlm.nih.gov/omim>); Oligoz. = Oligozoospermia; SCOS = Sertoli-cell-only syndrome. Gene information - name, location, IDs - available as Table S1. doi:10.1371/journal.pone.0019426.t006

putative causal genes identified were enriched for genes also implied in spermatogenesis. When comparing results of these and the current study, CNVs in the *PLEC*, *TSPAN7*, *PAK3*, *TRCP5*,

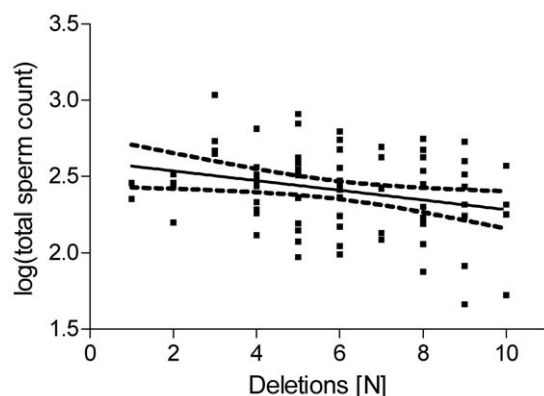

**Figure 5. Significant negative correlation ( $r = -0.270$ ,  $P < 0.05$ ) of total sperm count with number of deletions in 78 normozoospermic men analysed by 244A array.**  $P$ -value calculated on log-transformed total sperm counts. doi:10.1371/journal.pone.0019426.g005

*H2BFWT* loci were found not only in men with SCOS, but also in either patients with POF or XY gonadal dysgenesis (personal communication). These cover 5 of 11 genes identified in the current study which might hint to a common genetic origin of loss of spermatogonia in the male and loss of oogonia in the female resulting in SCOS, XY gonadal dysgenesis and POF, respectively.

With sperm counts ranging from zero to hundreds of millions per ejaculate, sperm output may be viewed as a quantitative trait and male infertility is sometimes postulated as a polygenic disease [26]. Some evidence for this hypothesis may be gained from the significant negative correlation between sperm counts and number of deletions described in our 78 normozoospermic men analysed by 244A array. Especially as hundreds of genes are implicated in spermatogenesis, it is plausible that more deletions also more often involve spermatogenesis-relevant genes. Therefore, a man bearing more deletions may have a less efficient spermatogenesis and therefore lower sperm output. We could, however, not detect a comparable correlation in the, albeit at most half as large, groups of normozoospermic men analysed by 400K arrays or in oligozoospermic patients (irrespective of array used).

While on the one hand the selection of our control group from the patient clientele avoids population stratification, on the other

hand the conclusions drawn primarily remain limited to the phenotype of spermatogenic failure and cannot be readily extended to fertility. For this purpose, a group of proven fertile men (fathers) would be needed as additional controls. However, at least one-fifth of our normozoospermic controls had fathered a child before then presenting with either secondary infertility or infertility in a new relationship. Contrariwise, the usually utilised Database of Genomic Variants (DGV) of 'healthy' controls is not amenable to be used with respect to the phenotype of spermatogenic impairment, as the fertility status (let alone spermatogenesis) is unknown. Thus, as a larger group of proven fertile men was neither available to us nor has - to our knowledge - been analysed anywhere else yet, our control group may well be used to study spermatogenesis. The CNV data of the 100 controls is provided as supplement as well as accessible through dbVar and will be valuable for other studies on genetics of male infertility.

In contrast to many candidate-gene approaches, only one recently published study analysed 80 men with normozoospermia, 52 with OAT, and 40 with non-obstructive azoospermia (histology not mentioned) using whole genome SNP arrays [27]. Twenty-one SNPs were found significantly associated with azoospermia or oligozoospermia, but only four could be replicated in a larger follow-up study [28]. We applied a more stringent patient selection especially for the group of azoospermia as the known histology of SCOS leads to one of the most homogeneous phenotypes possible in male infertility. Accordingly, we could identify a larger number of putative causal CNVs/genes in SCOS than in oligozoospermia. All the recurring, patient-specific and private, sex-chromosomal CNVs as well as the CNVs associated with SCOS described herein are candidates deserving further detailed analyses in larger patient and control groups as well as other populations. Especially with respect to the sex-chromosomal CNVs, analyses of trios would be helpful to determine their relevance. It should be considered, however, that involving the parents of infertile patients is very difficult in comparison to other diseases.

In conclusion, by the first CNV study in male infertility, we provide evidence that CNVs contribute to the complex origin of male infertility and present a number of candidate genes possibly causing or being risk factors for spermatogenic failure.

## References

- Tüttelmann F, Nieschlag E (2010) Classification of andrological disorders. In: Nieschlag E, Behre HM, Nieschlag S, eds. *Andrology: Male Reproductive Health and Dysfunction*. Heidelberg: Springer. pp 87–92.
- Tüttelmann F, Werny F, Cooper TG, Kliesch S, Simoni M, et al. (2010) Clinical experience with azoospermia: Aetiology and chances for spermatozoa detection upon biopsy. *Int J Androl Jun* 28: [Epub ahead of print].
- Huang WJ, Yen PH (2008) Genetics of spermatogenic failure. *Sex Dev* 2: 251–259.
- McLachlan RI, O'Bryan MK (2010) State of the art for genetic testing of infertile men. *J Clin Endocrinol Metab* 95: 1013–1024.
- Schultz N, Hamra FK, Garbers DL (2003) A multitude of genes expressed solely in meiotic or postmeiotic spermatogenic cells offers a myriad of contraceptive targets. *Proc Natl Acad Sci U S A* 100: 12201–12206.
- Matzuk MM, Lamb DJ (2008) The biology of infertility: Research advances and clinical challenges. *Nat Med* 14: 1197–1213.
- Yan W (2009) Male infertility caused by spermiogenic defects: Lessons from gene knockouts. *Mol Cell Endocrinol* 306: 24–32.
- Tüttelmann F, Rajpert-De Meyts E, Nieschlag E, Simoni M (2007) Gene polymorphisms and male infertility - a meta-analysis and literature review. *Reprod Biomed Online* 15: 643–658.
- Ferlin A, Raicu F, Gatta V, Zuccarello D, Palka G, et al. (2007) Male infertility: Role of genetic background. *Reprod Biomed Online* 14: 734–745.
- Nuti F, Krausz C (2008) Gene polymorphisms/mutations relevant to abnormal spermatogenesis. *Reprod Biomed Online* 16: 504–513.
- Fanciulli M, Petretto E, Aitman TJ (2010) Gene copy number variation and common human disease. *Clin Genet* 77: 201–213.
- Redon R, Ishikawa S, Fitch KR, Feuk L, Perry GH, et al. (2006) Global variation in copy number in the human genome. *Nature* 444: 444–454.

## Supporting Information

**Table S1 Information about mentioned genes (OMIM = Online Mendelian Inheritance in Man, <http://www.ncbi.nlm.nih.gov/omim>).**

(XLS)

**Table S2 CNVs found in 100 normozoospermic controls.**

(XLS)

**Table S3 All recurring deletions with comparison of frequency (number of cases/all cases; percentage in brackets) between groups.** If CNVs were only found by higher-resolution 400K-array, the number of all cases is reduced to 22 for normozoospermic controls and to 47 for patients with severe oligozoospermia (see methods). *P*-values calculated by Fisher's exact test. SCOS = Sertoli-cell-only syndrome.

(XLS)

**Table S4 All recurring duplications with comparison of frequency (number of cases/all cases; percentage in brackets) between groups.** If CNVs were only found by higher-resolution 400K-array, the number of all cases is reduced to 22 for normozoospermic controls and to 47 for patients with severe oligozoospermia (see methods). *P*-values calculated by Fisher's exact test. SCOS = Sertoli-cell-only syndrome.

(XLS)

**Table S4 All recurring duplications with comparison of frequency (number of cases/all cases; percentage in brackets) between groups.** If CNVs were only found by higher-resolution 400K-array, the number of all cases is reduced to 22 for normozoospermic controls and to 47 for patients with severe oligozoospermia (see methods). *P*-values calculated by Fisher's exact test. SCOS = Sertoli-cell-only syndrome.

If CNVs were only found by higher-resolution 400K-array, the number of all cases is reduced to 22 for normozoospermic controls and to 47 for patients with severe oligozoospermia (see methods). *P*-values calculated by Fisher's exact test. SCOS = Sertoli-cell-only syndrome.

(XLS)

## Acknowledgments

The authors thank the patients and physicians who took care of them at the Centre of Reproductive Medicine and Prof. Jörg Gromoll for general support. The technical assistance of Mandy Hoffmann, Katja Hagen, Nilusha Sivapalan and Gerrit Randau is gratefully acknowledged. We thank Prof. Sören W. Perrey, University of Applied Sciences, Gelsenkirchen, for the development of a tool for automated DGV queries.

## Author Contributions

Conceived and designed the experiments: FT MS BD PW. Performed the experiments: FT SL AR. Analyzed the data: FT AR. Contributed reagents/materials/analysis tools: FT SK PW AR. Wrote the paper: FT AR. Characterised and selected the subjects: FT MS SK. Approved the manuscript: FT MS SK SL BD PW AR.

23. Jakobsson J, Ekstrom L, Inotsume N, Garle M, Lorentzon M, et al. (2006) Large differences in testosterone excretion in korean and swedish men are strongly associated with a UDP-glucuronosyl transferase 2B17 polymorphism. *J Clin Endocrinol Metab* 91: 687–693.
24. Juul A, Sorensen K, Aksglaede L, Garn I, Rajpert-De Meyts E, et al. (2009) A common deletion in the uridine diphosphate glucuronyltransferase (UGT) 2B17 gene is a strong determinant of androgen excretion in healthy pubertal boys. *J Clin Endocrinol Metab* 94: 1005–1011.
25. Kim J, Lee H, Kim Y, Yoo S, Park E, et al. (2010) The SAM domains of anks family proteins are critically involved in modulating the degradation of EphA receptors. *Mol Cell Biol* 30: 1582–1592.
26. Nishimune Y, Tanaka H (2006) Infertility caused by polymorphisms or mutations in spermatogenesis-specific genes. *J Androl* 27: 326–334.
27. Aston KI, Carrell DT (2009) Genome-wide study of single-nucleotide polymorphisms associated with azoospermia and severe oligozoospermia. *J Androl* 30: 711–725.
28. Aston KI, Krausz C, Lafae I, Ruiz-Castane E, Carrell DT (2010) Evaluation of 172 candidate polymorphisms for association with oligozoospermia or azoospermia in a large cohort of men of european descent. *Hum Reprod* 25: 1383–1397.
29. Guttman JA, Mulholland DJ, Vogl AW (1999) Plectin is concentrated at intercellular junctions and at the nuclear surface in morphologically differentiated rat sertoli cells. *Anat Rec* 254: 418–428.
30. Jelinic P, Stehle JC, Shaw P (2006) The testis-specific factor CTCFL cooperates with the protein methyltransferase PRMT7 in H19 imprinting control region methylation. *PLoS Biol* 4: e355.
31. Radhakrishnan Y, Hamil KG, Tan JA, Grossman G, Petrusz P, et al. (2009) Novel partners of SPAG11B isoform D in the human male reproductive tract. *Biol Reprod* 81: 647–656.
32. Gure AO, Wei IJ, Old LJ, Chen YT (2002) The Ssx gene family: Characterization of 9 complete genes. *Int J Cancer* 101: 448–453.
33. Chen YT, Alpen B, Ono T, Gure AO, Scanlan MA, et al. (2003) Identification and characterization of mouse Ssx genes: A multigene family on the X chromosome with restricted cancer/testis expression. *Genomics* 82: 628–636.
34. Kouprina N, Noskov VN, Pavlicek A, Collins NK, Schoppee Bortz PD, et al. (2007) Evolutionary diversification of SPANX-N sperm protein gene structure and expression. *PLoS One* 2: e359.
35. Yang QS, Xia F, Gu SH, Yuan HL, Chen JZ, et al. (2002) Cloning and expression pattern of a spermatogenesis-related gene, BEX1, mapped to chromosome Xq22. *Biochem Genet* 40: 1–12.
36. Sasaki M, Takeda E, Takano K, Yomogida K, Katahira J, et al. (2005) Molecular cloning and functional characterization of mouse nxf family gene products. *Genomics* 85: 641–653.
37. Pan J, Eckardt S, Leu NA, Buffone MG, Zhou J, et al. (2009) Inactivation of Nxf2 causes defects in male meiosis and age-dependent depletion of spermatogonia. *Dev Biol* 330: 167–174.
38. Churikov D, Siino J, Svetlova M, Zhang K, Gineitis A, et al. (2004) Novel human testis-specific histone H2B encoded by the interrupted gene on the X chromosome. *Genomics* 84: 745–756.
39. Boulard M, Gautier T, Mbele GO, Gerson V, Hamiche A, et al. (2006) The NH2 tail of the novel histone variant H2BFWT exhibits properties distinct from conventional H2B with respect to the assembly of mitotic chromosomes. *Mol Cell Biol* 26: 1518–1526.
40. Lee J, Park HS, Kim HH, Yun YJ, Lee DR, et al. (2009) Functional polymorphism in H2BFWT-5'UTR is associated with susceptibility to male infertility. *J Cell Mol Med* 13: 1942–1951.
41. Kohn M, Steinbach P, Hameister H, Kehrer-Sawatzki H (2004) A comparative expression analysis of four MRX genes regulating intracellular signalling via small GTPases. *Eur J Hum Genet* 12: 29–37.
42. Sutton KA, Jungnickel MK, Wang Y, Cullen K, Lambert S, et al. (2004) Enkurin is a novel calmodulin and TRPC channel binding protein in sperm. *Dev Biol* 274: 426–435.
